# Supplementary material for: Fabrication of a novel heteroepitaxial structure from an MOF-on-MOF architecture as a photocatalyst for highly efficient Cr(vi) reduction
Source: Royal Society of Chemistry journal article supplement (doi:10.1039/d1nj05440f), 2022-01-01
Supplement: d1nj05440f1.pdf [file d1nj05440f1.pdf]

## Fabrication of a Novel Heteroepitaxial structure from MOF-on-MOF Architecture as a Photocatalyst for Highly Efficient Cr(VI) Reduction

Negin Khosroshahi, Moein Darabi Goudarzi, Vahid Safarifard\*

Department of Chemistry, Iran University of Science and Technology, Tehran 16846-13114, Iran,

E-mail: vsafarifard@iust.ac.ir

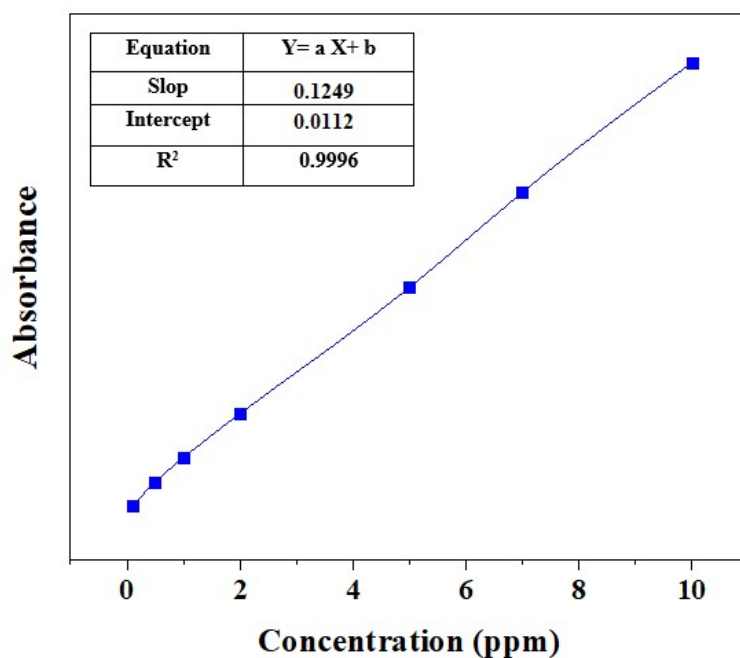

Figure S1. Calibration curve of Cr(VI)-diphenylcarbazide solution.

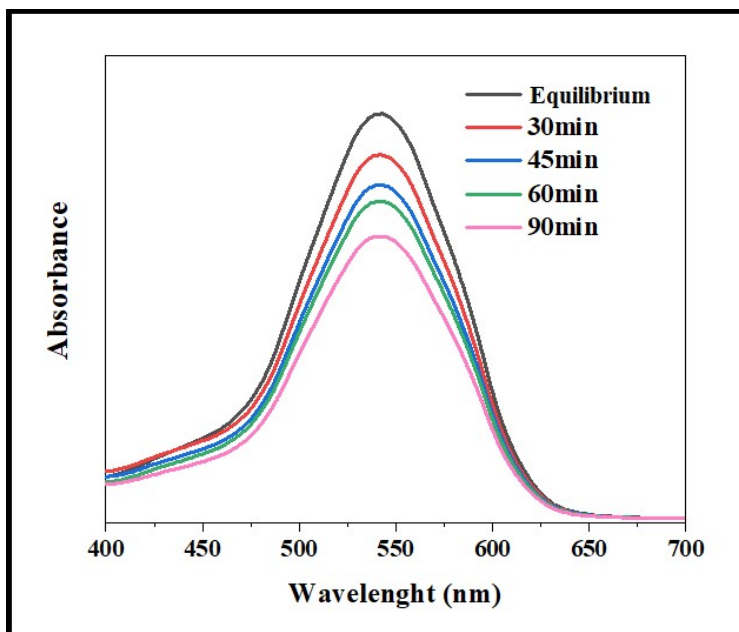

**Figure S2.** Absorption spectra for photocatalytic reduction of Cr(VI) to Cr(III) catalyzed by Ce-on-Zr-MOF-808(1:1) in the absence of scavenger.

**Figure S3.** Absorption spectra for photocatalytic reduction of Cr(VI) to Cr(III) catalyzed by Ce-on-Zr-MOF-808(1:1) in the absence of acid.

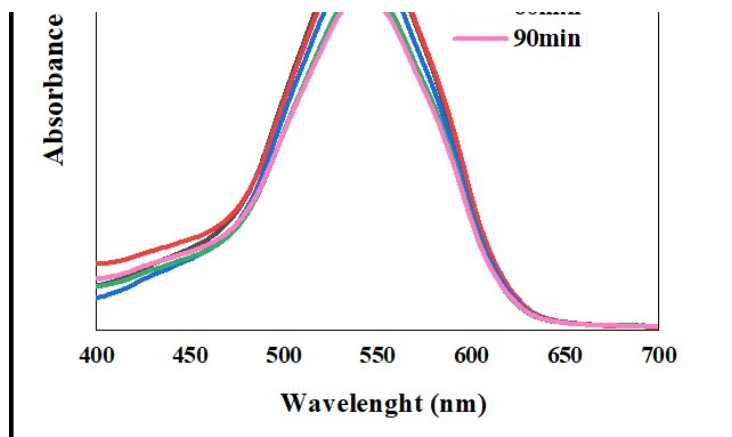

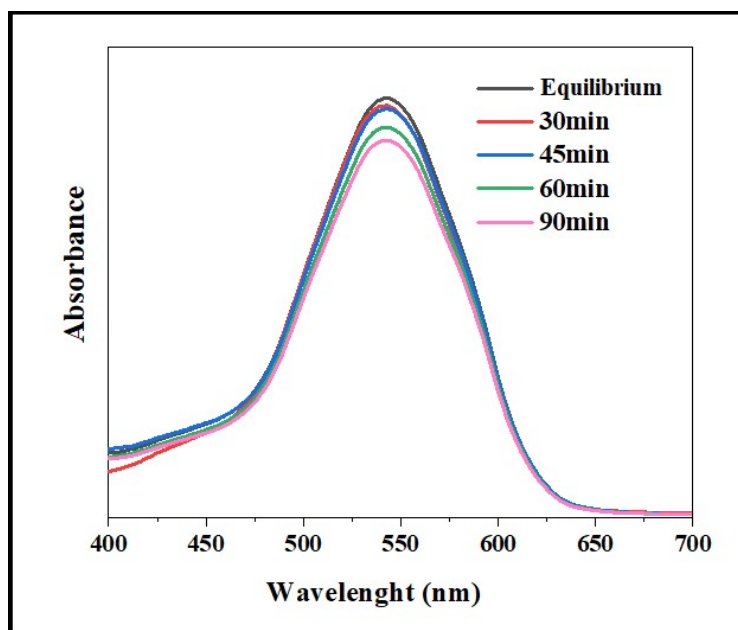

**Figure S4.** Absorption spectra for photocatalytic reduction of Cr(VI) to Cr(III) catalyzed by Ce-on-Zr-MOF-808(1:1) in the absence of light.

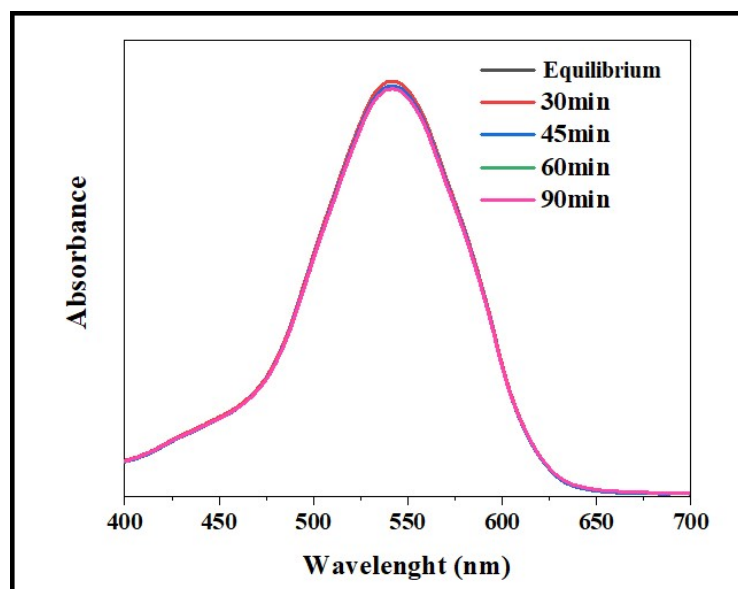

**Figure S5.** Absorption spectra for photocatalytic reduction of Cr(VI) to Cr(III) catalyzed by Ce-on-Zr-MOF-808(1:1) in the absence of catalyst.

| <b>S.No.</b> | <b>Catalysts</b>                            | <b>Light source</b> | <b>pH</b> | <b>Reduction (%)</b> | <b>Time (min)</b> | <b>Ref.</b>      |
|--------------|---------------------------------------------|---------------------|-----------|----------------------|-------------------|------------------|
| 1            | NTU-9/NH <sub>2</sub> -MIL-125              | UV                  | 3         | 100                  | 90                | [1]              |
| 2            | NH <sub>2</sub> -UiO-66                     | Visible             | 2         | 97                   | 80                | [2]              |
| 3            | MIL-125(Ti)                                 | Xe-lamp             | 2         | 97                   | 60                | [3]              |
| 4            | UiO-66(Zr/Hf)                               | Visible             | 2         | 98                   | 120               | [4]              |
| 5            | NNU-36                                      | Visible             | 2.17      | 95.3                 | 60                | [5]              |
| 6            | MoO <sub>3</sub> @ZIF-8                     | Visible             | –         | 96                   | 40                | [6]              |
| 7            | PCN-222                                     | Visible             | 1         | 100                  | 25                | [7]              |
| 8            | g-C <sub>3</sub> N <sub>4</sub> /MIL-53(Fe) | Visible             | 2         | 100                  | 180               | [8]              |
| 9            | MIL-68(In)-NH <sub>2</sub>                  | Xe-lamp             | 2         | 97                   | 180               | [9]              |
| 10           | MIL-101(Fe)                                 | Visible             | 2         | 100                  | 60                | [10]             |
| 11           | Ce-MOF-808                                  | Visible             | 2         | 99.6                 | 90                | <b>This work</b> |
| 12           | Ce-on-Zr-MOF-808                            | Visible             | 2         | 100                  | 45                | <b>This work</b> |

## References

1. Dhivya, E., et al., *Synthesis of titanium based hetero MOF photocatalyst for reduction of Cr (VI) from wastewater*. Journal of Environmental Chemical Engineering, 2019. **7**(4): p. 103240.
2. Shen, L., et al., *Multifunctional NH<sub>2</sub>-mediated zirconium metal–organic framework as an efficient visible-light-driven photocatalyst for selective oxidation of alcohols and reduction of aqueous Cr (vi)*. Dalton Transactions, 2013. **42**(37): p. 13649-13657.
3. Wang, H., et al., *Facile synthesis of amino-functionalized titanium metal-organic frameworks and their superior visible-light photocatalytic activity for Cr (VI) reduction*. Journal of hazardous materials, 2015. **286**: p. 187-194.
4. Du, X.-D., et al., *Robust photocatalytic reduction of Cr (VI) on UiO-66-NH<sub>2</sub> (Zr/Hf) metal-organic framework membrane under sunlight irradiation*. Chemical Engineering Journal, 2019. **356**: p. 393-399.
5. Zhao, H., et al., *Construction of pillared-layer MOF as efficient visible-light photocatalysts for aqueous Cr (VI) reduction and dye degradation*. ACS Sustainable Chemistry & Engineering, 2017. **5**(5): p. 4449-4456.
6. Zhang, Y. and S.-J. Park, *Facile construction of MoO<sub>3</sub>@ ZIF-8 core-shell nanorods for efficient photoreduction of aqueous Cr (VI)*. Applied Catalysis B: Environmental, 2019. **240**: p. 92-101.
7. Sharma, N., et al., *Highly efficient visible-light-driven reduction of Cr (VI) from water by porphyrin-based metal–organic frameworks: effect of band gap engineering on the photocatalytic activity*. Catalysis Science & Technology, 2020. **10**(22): p. 7724-7733.
8. Tang, H., et al., *AgBr and g-C<sub>3</sub>N<sub>4</sub> co-modified Ag<sub>2</sub>CO<sub>3</sub> photocatalyst: a novel multi-heterostructured photocatalyst with enhanced photocatalytic activity*. Applied Surface Science, 2017. **391**: p. 440-448.
9. Liang, R., et al., *NH<sub>2</sub>-mediated indium metal–organic framework as a novel visible-light-driven photocatalyst for reduction of the aqueous Cr (VI)*. Applied Catalysis B: Environmental, 2015. **162**: p. 245-251.
10. Shi, L., et al., *An amine-functionalized iron (III) metal–organic framework as efficient visible-light photocatalyst for Cr (VI) reduction*. Advanced science, 2015. **2**(3): p. 1500006.
